# Supplementary material for: Comprehensive analysis of single molecule sequencing-derived complete genome and whole transcriptome of Hyposidra talaca nuclear polyhedrosis virus
Source: PubMed Central journal article supplement (PMC5997678; doi:10.1038/s41598-018-27084-y), 2018-06-12

## Supplementary figures:

### **Comprehensive analysis of single molecule sequencing-derived complete genome and whole transcriptome of *Hyposidra talaca* nuclear polyhedrosis virus**

Thong T. Nguyen<sup>1</sup>, Kushal Suryamohan<sup>1</sup>, Boney Kuriakose<sup>2,3</sup>, Vasantharajan Jankiraman<sup>1</sup>, Mike Reichelt<sup>4</sup>, Subhra Chaudhuri<sup>1</sup>, Joseph Guillory<sup>1</sup>, Neethu Divakaran<sup>2</sup>, Rabins PE<sup>2</sup>, Ridhi Goel<sup>2</sup>, Bhabesh Deka<sup>5</sup>, Suman Sarkar<sup>5</sup>, Preety Ekka<sup>5</sup>, Yu-Chih Tsai<sup>6</sup>, Derek Vargas<sup>1</sup>, Sam Santhosh<sup>7</sup>, Sangeetha Mohan<sup>7</sup>, Chen-Shan Chin<sup>6</sup>, Jonas Korfach<sup>6</sup>, George Thomas<sup>2,3</sup>, Azariah Babu<sup>5</sup> and Somasekar Seshagiri<sup>1\*</sup>

<sup>1</sup>Department of Molecular Biology, Genentech Inc., 1 DNA WAY, South San Francisco, CA, 94080, USA; <sup>2</sup>AgriGenome Labs Private Limited, 501, SCK01 Building, SmartCity Kochi, Infopark Road, Kakkanad, Kochi, Kerala, 682 042, India; <sup>3</sup>SciGenom Research Foundation, 3rd Floor, Narayana Health City, #258/A, Bommasandra, Hosur Road, Bangalore, Karnataka, 560 099, India; <sup>4</sup>Department of Pathology, Genentech Inc., 1 DNA WAY, South San Francisco, CA, 94080, USA; <sup>5</sup>Tea Research Association, North Bengal Regional R & D Centre, Nagrakata, Jalpaiguri, West Bengal, 735 225, India; <sup>6</sup>Pacific Biosciences, 1305 O'Brien Dr, Menlo Park, CA, 94025, USA; <sup>7</sup>SciGenom Labs Pvt Ltd, Plot no: 43A,SDF, 3<sup>rd</sup> floor, A Block, CSEZ, Kakkanad, Kochi, Kerala, 682 037, India.

\*Correspondence. S.S. sekar@gene.com; phone: 650-225-1000; fax: 650-225-1762

## Supplementary Figure legends

**Supplementary Figure S1:** Flowchart showing pipeline used for ORFs detection and annotation of the HytaNPV genome.

**Supplementary Figure S2:** Expression of HytaNPV ORFs at 24h and 72h using RNA-seq data.

**Supplementary Figure S3:** Comparison of HytaNPV against other baculoviruses used for biopesticides. Heatmap showing amino acid identity (%) resulting from blastp (evalue  $\leq 1$ ) of HytaNPV protein sequences against protein sequences of all complete baculovirus genomes.

**Supplementary Figure S4:** Alignment of repeat sequences from HytaNPV and that observed in BusuNPV.

**Supplementary Figure S5:** Alignment of F and F-like proteins across baculoviruses. The multiple-sequence alignment was carried out using Clustal Omega<sup>1</sup> and visualized using Jalview software<sup>2</sup>. Cartoon of conserved regions (SP – signal peptide; FP – fusion peptide; S-S disulfide bridge; TM – transmembrane domain) of SeMNPV F protein shown at the bottom was adapted from Westenberg et al.<sup>3</sup>. Order of protein sequences appear on the left was determined by Clustal Omega's algorithm. A1 – Alphabaculovirus group I, B – Betabaculovirus; A2 – Alphabaculovirus group II. Amino acid conservation was highlighted in blue.

**Supplementary Figure S6:** Alignment of DNA sequences upstream of *polyhedrin* gene of AcMNPV, BusuNPV, SujuNPV and HytaNPV showing a conserved core promoter region.

## Reference:

- 1 Sievers, F. *et al.* Fast, scalable generation of high-quality protein multiple sequence alignments using Clustal Omega. *Mol Syst Biol* **7**, 539, doi:10.1038/msb.2011.75 (2011).
- 2 Clamp, M., Cuff, J., Searle, S. M. & Barton, G. J. The Jalview Java alignment editor. *Bioinformatics* **20**, 426-427, doi:10.1093/bioinformatics/btg430 (2004).
- 3 Westenberg, M. *et al.* Functional analysis of the putative fusion domain of the baculovirus envelope fusion protein F. *J Virol* **78**, 6946-6954, doi:10.1128/JVI.78.13.6946-6954.2004 (2004).

# Supplementary Figure S1

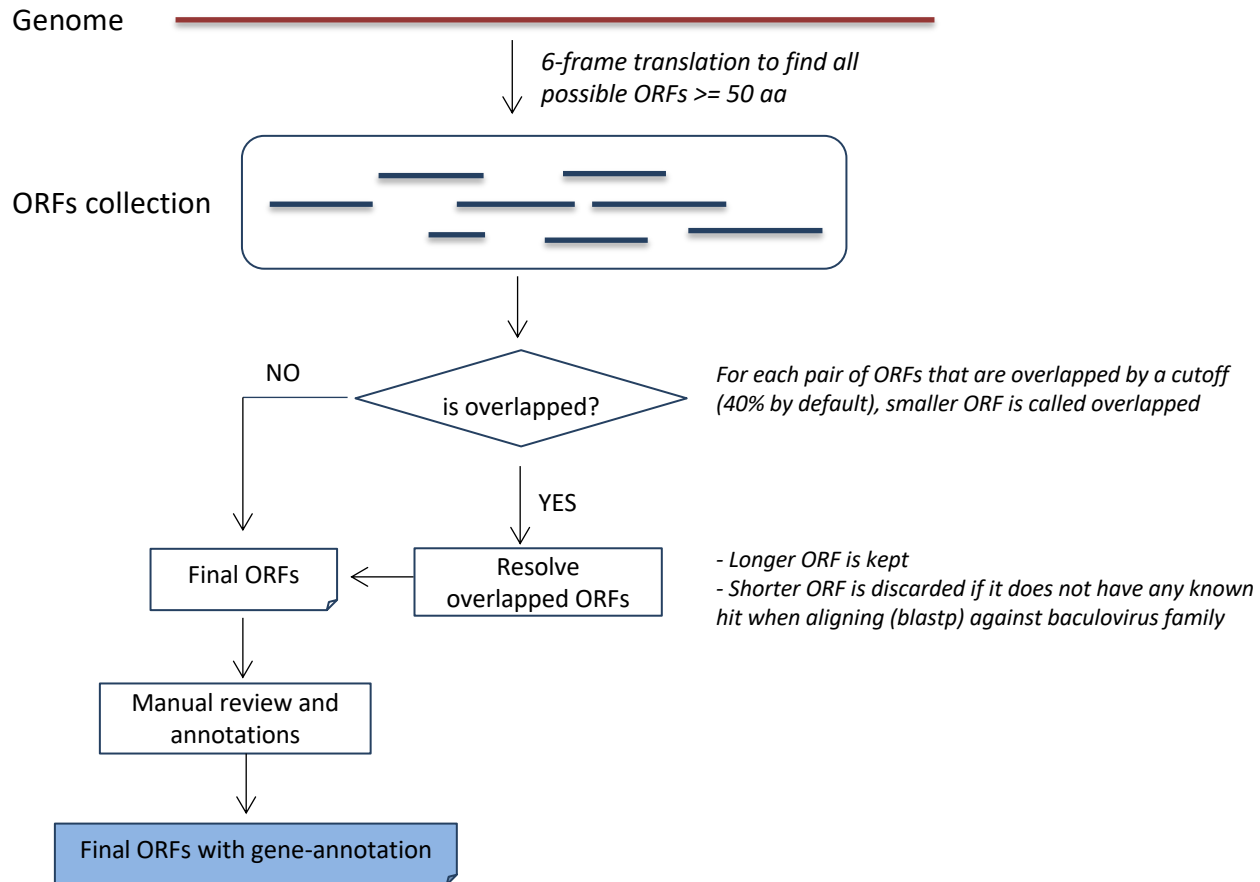

# Supplementary Figure S2

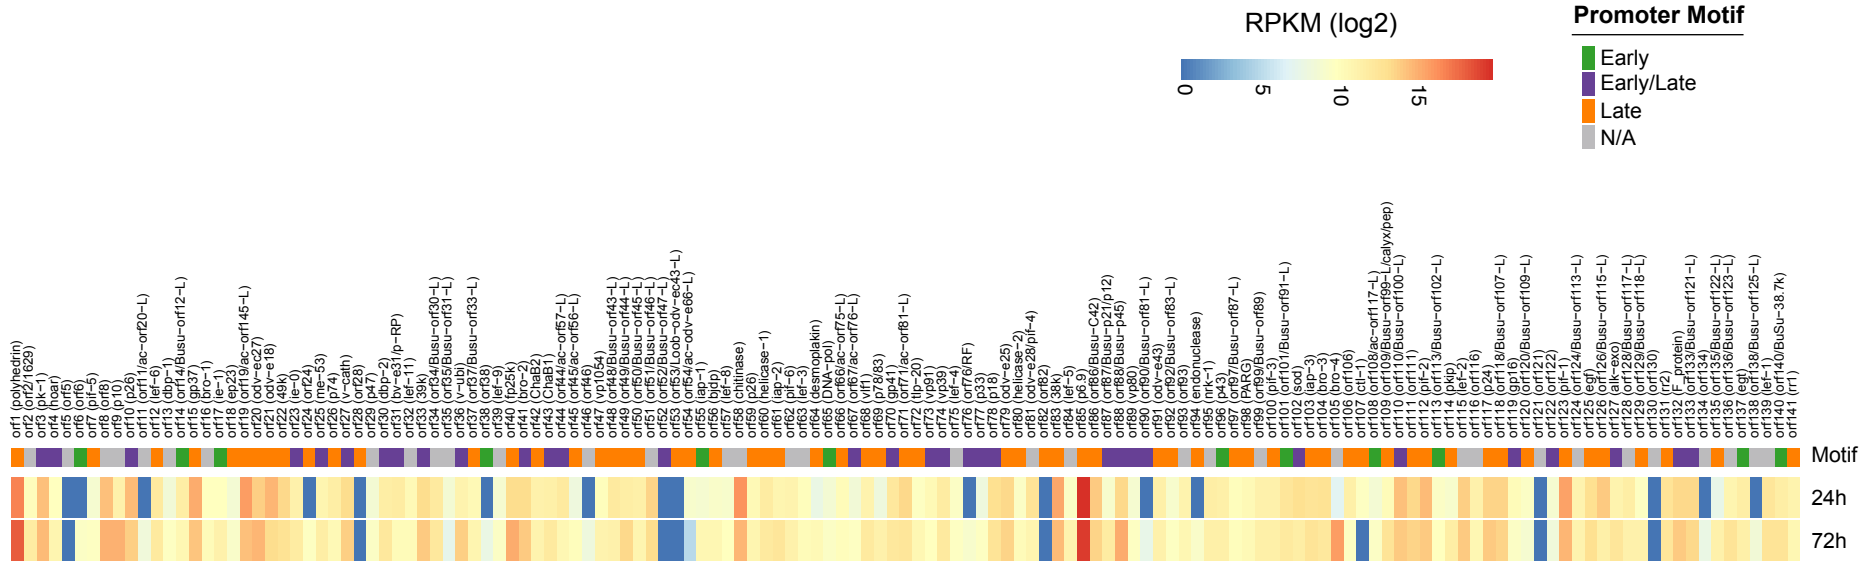

# Supplementary Figure S3

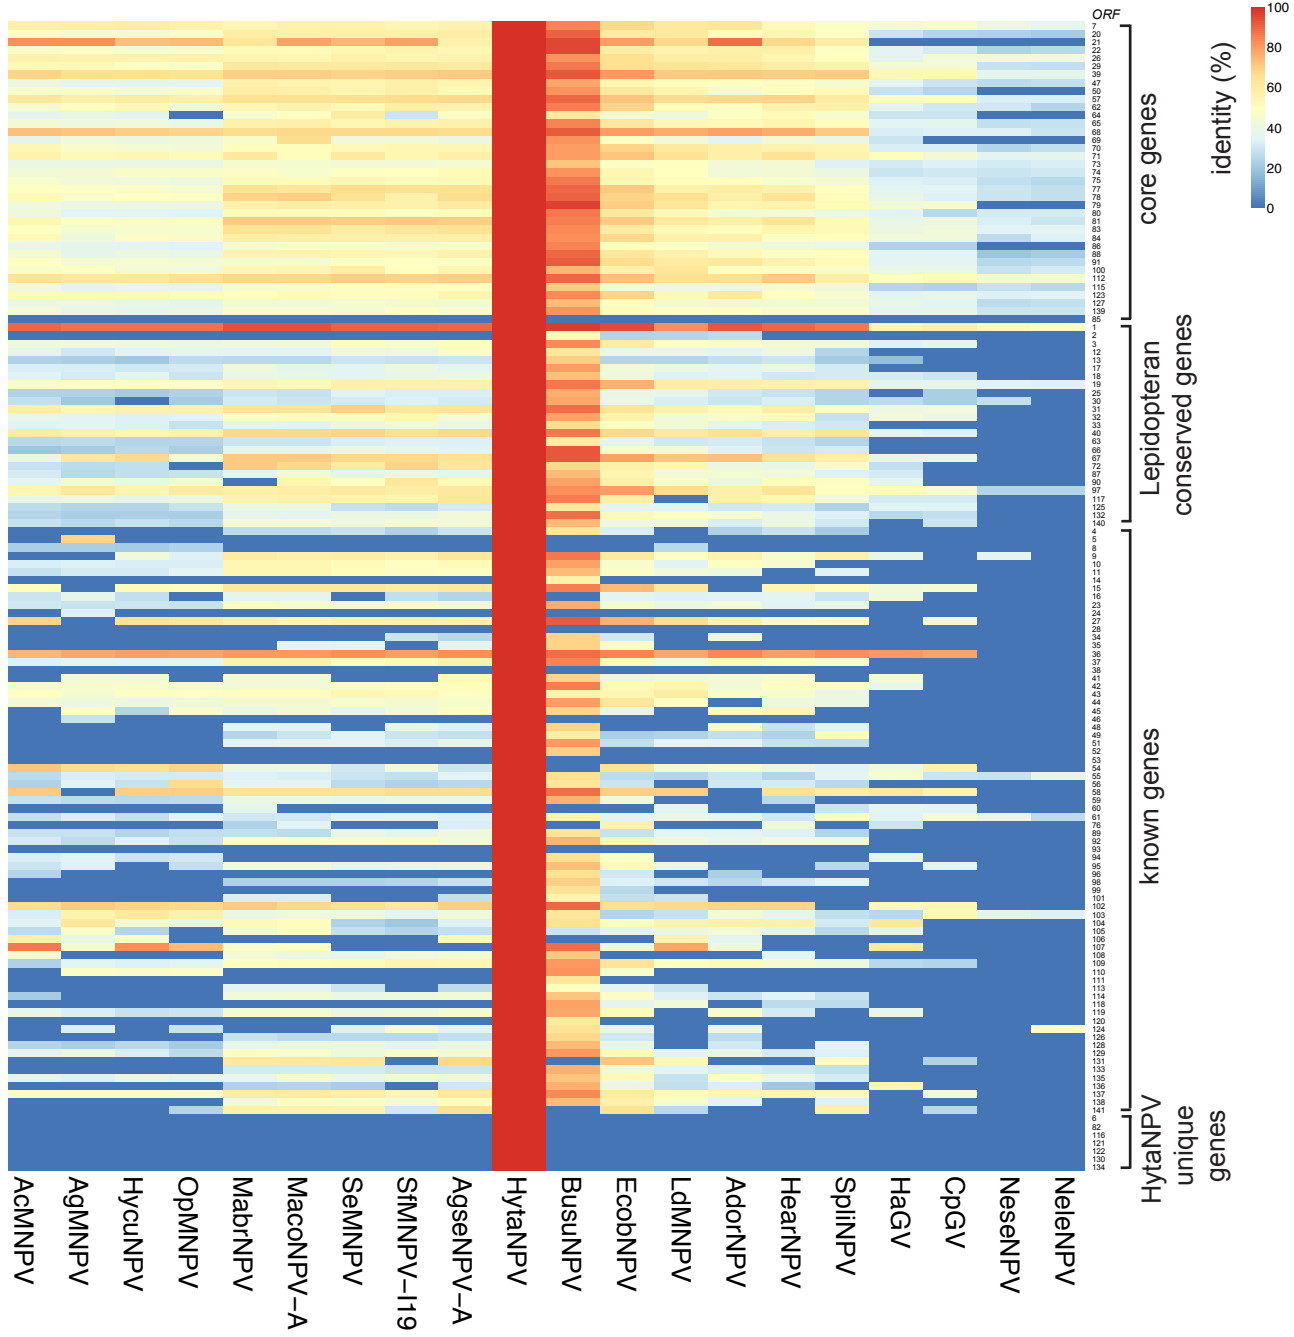

# Supplementary Figure S4

- repeat3-type1-46
- repeat3-type2-46
- repeat4 - type3-46
- repeat 5 -46
- repeat 6-46
- repeat 7-46
- busurepeat

```
TCGAAAATAACTTTTACTTTTAGATCTAACTGAAAGCCAAAATCTA
TCGAAAATAACTTTTACTTTTAGATCTAACTGAAAGCCAGAAATTC
TGACTTTTACTTTTGGATCTAACTAAAAGCAAGAAATCTATCGAATA
AGAAATCTATCGAAAATAACTTTTACTTTTAGATCTAACTAAAAGCC
AAAGCCAGAAATTTATCGAAAATGACTTTTACTTTTAGATTGAACTG
AAAGCCAGAAATTTATCGAAAATGACTTTTACTTTTAGATTGAACTA
CAGTATCAAAATATTTAGACT:TCTCGATTGTTGCTTTACTTTTAGATTTAACTGAAAG
```

# Supplementary Figure S5

A1

B

A2

|                       |            |           |            |             |          |           |          |          |        |         |           |             |          |   |
|-----------------------|------------|-----------|------------|-------------|----------|-----------|----------|----------|--------|---------|-----------|-------------|----------|---|
| AGA16177.1 ThorMNPV   | E-FAAYDDDD | SSSGGGGDI | AEQGHWSNLT | SDAQNLLR    | NP-PKD   | HFYPYK    | IYINTASE | EK-I     | QDSNNT | TIIVSII | IIVALVLF  | GF-VIFLYFCV |          |   |
| ABL75966.1 HavMNPV    | E-FVYDYE   | HLSHWSNMT | VSQAQALLO  | NP-PKD      | HFYRPSK  | IYNTSATS  | DE       | KDNNIN   | IVIMI  | IAVAALL | LLCGL     | MIIFLFCI    |          |   |
| AC057205.1 BomMalNPV  | D-FVYDYE   | PSHWSNMT  | VSQAQALLO  | NP-PKD      | HFHQSK   | IYNTSATS  | DSDS     | QDSSIT   | TVVVI  | IAVAAL  | FLFCSL    | SLFLFCI     |          |   |
| AC63697.1 BmMNPV      | D-FVYDYE   | PSHWSNMT  | VSQAQALLO  | NP-PKD      | HFHQSK   | IYNTSATS  | DSDS     | QDSSNIT  | TVVVI  | IAVAAL  | FLFCSL    | LLFLFCI     |          |   |
| AAM28022.1 RoMNPV     | E-FVYDYE   | QPSHWSNMT | VSQAQTLNR  | NP-PKD      | HFHQSK   | IYNTSAAAP | DSDS     | QDDNNT   | IIVIV  | IAVAIL  | LLFCGL    | LFLYCCI     |          |   |
| AA66653.1 AcMNPV      | E-FVYDYE   | QPSHWSNMT | VSQAQALLR  | NP-PKD      | HFHQSK   | IYNTSAAAP | DSDS     | QDSSNTT  | VVIA   | IAVAAM  | LLFCGL    | LLFLFCI     |          |   |
| ABE68408.1 PxyMNPV    | E-FVYDYE   | QPSHWSNMT | VSQAQALLR  | NP-PKD      | HFHQSK   | IYNTSAAAP | DSDS     | QDSSNTT  | VVIA   | IAVAAM  | LLFCGL    | LLFLFCI     |          |   |
| AAK85583.1 EppMNPV    | D-FNYIDNR  | QENVYDNT  | HNVHATQ    | LNISEAR     | ILNLTDL  | TKD       | PFSPHN   | DLPTO    | P      | IYVTVI  | SALCVVMFY | CMY         |          |   |
| BAE72419.1 HyuMNPV    | DFVYDTR    | PQNIIDVNT | KNKPRWS    | LLSAGVRELLT | AD-ASD   | VFYSQR    | INVPD    | TKPA     | QNNANV | VLI     | SVLVSV    | GFSAFCV     | IYAGYCLL |   |
| AGR57168.1 ChroMNPV   | N-1EYDAP   | QTD       | VDAHNP     | PHWSK       | VSAAVKA  | VLA       | AP-SRK   | SYFSPRR  | NDVGA  | H       | EPPT      | QNKVNVV     | VLV      |   |
| AKR14213.1 DapuMNPV   | E-VDYDTR   | QDDAA     | FADAHNP    | PHWSV       | VSAAVKE  | LLA       | VAPPRD   | TFAPRR   | SDAAA  | P       | DPH       | EK          | PT       |   |
| AC59020.2 OpMNPV      | E-VDYDTR   | QDDAA     | FADAHNP    | PHWSV       | VSAAVKE  | LLA       | VAPPRD   | TFAPRR   | SDAAA  | P       | DPH       | EK          | PT       |   |
| AHD25615.1 ChmuMNPV   | E-FDYDTR   | QDDTA     | FADAHNP    | PHWST       | VGAAD    | IKALLA    | APPPRH   | RFFSPRR  | NDVNA  | P       | ELPV      | QNEHNI      | VLV      |   |
| AA29812.3 CfMNPV      | E-FDYDTR   | QDDTA     | FADAHNP    | PHWST       | VGAAD    | IKALLA    | APPPRH   | RFFSPRR  | NDVNA  | P       | ELPV      | PNEHNI      | VLV      |   |
| AGR57018.1 ChocNPV    | E-FDYDTR   | QDDTA     | FADAHNP    | PHWST       | VGAAD    | IKALLA    | APPPRH   | RFFSPRR  | NDVNA  | P       | ELPV      | PNEHNI      | VLV      |   |
| ABF50356.1 AnpeNPV    | F-FDYDTR   | QDDAD     | DEASHAH    | WSDVNA      | AAARALLR | GA-AAN    | LFFSPRR  | DV-OA    | P      | EPYV    | DTNTGAV   | L           |          |   |
| AFY62925.1 PhcyNPV    | F-FDYDTR   | QDDAD     | DEASHAH    | WSDVNA      | AAARALLR | GA-AAN    | LFFSPRR  | DV-OA    | P      | EPYV    | DTNTGAV   | L           |          |   |
| AJD09285.1 CoveNPV    | F-FDYDTR   | QDDADY    | ADTNP      | PHWSE       | VSMVDR   | ALMR      | GG-STN   | NFFALRN  | NV-HS  | P       | QIVD      | KNVDLTY     | S        |   |
| ABI13806.1 AgMNPV     | F-FDYDTR   | QDDADY    | ADTNP      | PHWSE       | VSMVDR   | ALMR      | GG-STN   | NFFALRN  | NV-HS  | P       | QIVD      | KNVDLTY     | S        |   |
| AA091645.1 CIDEFNPV   | F-FDYDTR   | QDDADY    | ADTNP      | PHWSE       | VSMVDR   | ALMR      | GG-STN   | NFFALRN  | NV-HS  | P       | QIVD      | KNVDLTY     | S        |   |
| ANF29764.1 CapoNPV    | I-YDDNDG   | LDVKKANG  | INGDGG     | IDGNNS      | KWVLT    | ENEAR     | TILORNET | SKHNGVDG | NRFF   | TFPOHNY | AVLHHP    | FNTKNAVD    | ININ     |   |
| ANF29765.1 JekMNPV    | I-YDDNDG   | SRELKTR   | MTAA       | AAAAA       | TAAADR   | LRHWS     | ELSN     | ENALM    | RR     | STSEK   | RFAPSK    | IYTL        | NV       |   |
| AKN81073.1 LooMNPV    | Y-EDDY     | DGSGDD    | KFLP       | ARDQ        | HWS      | ELN       | TARQL    | MLP      | NS     | ISA     | LVTR      | GYVMNVV     | I        |   |
| AKC91684.1 IlyspNPV   | ---        | AAAAGH    | KRNV       | FGGAF       | NFVGR    | VKY       | LF       | GVMDD    | DA     | ELLYK   | LA        | QSNTH       | H        |   |
| AKR17408.1 MolaGV     | ---        | PVRNG     | SKRNI      | FGGAF       | NFVGR    | VKY       | LF       | GVMDD    | DA     | ELLYK   | LA        | QSNTH       | H        |   |
| ACH69376.1 PsunGV     | ---        | PLKNS     | PKRNI      | FGGAF       | NFVGR    | VKY       | LF       | GVMDD    | DA     | ELLYK   | LA        | QSNTH       | H        |   |
| AOW41364.1 TnGV       | ---        | PLKNS     | PKRNI      | FGGAF       | NFVGR    | VKY       | LF       | GVMDD    | DA     | ELLYK   | LA        | QSNTH       | H        |   |
| ABY47717.1 HaGV       | ---        | PVKNG     | AKRNI      | FGGAF       | NFVGR    | VKY       | LF       | GVMDD    | DA     | ELLYK   | LA        | QSNTH       | H        |   |
| AAF05141.1 XcGV       | ---        | PVKNG     | AKRNI      | FGGAF       | NFVGR    | VKY       | LF       | GVMDD    | DA     | ELLYK   | LA        | QSNTH       | H        |   |
| AKN80710.1 DisaGV     | ---        | EEEST     | RKR        | LRG         | ---      | ---       | ---      | ---      | ---    | ---     | ---       | ---         | ---      |   |
| AB051967.1 SpiIGV     | ---        | VRV       | KRNL       | FNGA        | FVGR     | FDKY      | LF       | GVMDD    | DA     | ELLYK   | LA        | QSNTH       | H        |   |
| AA085660.1 AadorGV    | ---        | VDV       | NL         | GM          | LN       | FVGR      | TKY      | TI       | GM     | DD      | DA        | ELLYK       | LA       |   |
| AA627324.1 PlyxGV     | ---        | KRQR      | ELL        | GA          | FVGR     | FNY       | VY       | GM       | DD     | DA      | ELLYK     | LA          | QSNTH    | H |
| AE41440.1 EpapGV      | ---        | R         | SKR        | I           | FGGT     | NFVGR     | VKY      | LF       | GVMDD  | DA      | ELLYK     | LA          | QSNTH    | H |
| AMF83797.1 CnmeGV     | ---        | KRKR      | Q          | SWF         | SGT      | NFVGR     | FKNM     | I        | GM     | DD      | DA        | ELLYK       | LA       |   |
| AE800318.1 CianGV     | ---        | RMKR      | LN         | FNGA        | FVGR     | VKY       | LF       | GVMDD    | DA     | ELLYK   | LA        | QSNTH       | H        |   |
| AG020290.1 ClasGV/B   | ---        | R         | KRNL       | FNGA        | FVGR     | VKY       | LF       | GVMDD    | DA     | ELLYK   | LA        | QSNTH       | H        |   |
| AA852713.1 AgseGV     | ---        | R         | KRS        | I           | FGGAF    | NFVGR     | VKY      | LF       | GVMDD  | DA      | ELLYK     | LA          | QSNTH    | H |
| AKS25366.1 ClasGV/A   | ---        | GRV       | KRNL       | FNGA        | FVGR     | VKY       | LF       | GVMDD    | DA     | ELLYK   | LA        | QSNTH       | H        |   |
| AKS92028.1 EreiGV     | ---        | NRV       | KRNL       | FNGA        | FVGR     | VKY       | LF       | GVMDD    | DA     | ELLYK   | LA        | QSNTH       | H        |   |
| AP013911.1 PiGV       | ---        | R         | RKR        | I           | FGGAF    | NFVGR     | VKY      | LF       | GVMDD  | DA      | ELLYK     | LA          | QSNTH    | H |
| AA021625.1 CrieGV     | ---        | TRR       | KR         | GL          | FGGAF    | NFVGR     | VKY      | LF       | GVMDD  | DA      | ELLYK     | LA          | QSNTH    | H |
| AAK70691.1 CpGV       | ---        | RHR       | KR         | GL          | FGGAF    | NFVGR     | VKY      | LF       | GVMDD  | DA      | ELLYK     | LA          | QSNTH    | H |
| AAK70225.1 PhocGV     | ---        | K         | RL         | FGGAF       | NFVGR    | VKY       | LF       | GVMDD    | DA     | ELLYK   | LA        | QSNTH       | H        |   |
| ABC61157.1 ChocNPV    | ---        | S         | RT         | K           | RG       | FGGAF     | NFVGR    | VKY      | LF     | GVMDD   | DA        | ELLYK       | LA       |   |
| AC63512.1 PiraGV      | ---        | NRRT      | K          | RG          | FGGAF    | NFVGR     | VKY      | LF       | GVMDD  | DA      | ELLYK     | LA          | QSNTH    | H |
| AKC91636.1 IafMNPV    | NGEAAA     | SKPA      | KRRKR      | ---         | ---      | ---       | ---      | ---      | ---    | ---     | ---       | ---         | ---      |   |
| BAC67369.1 AdhoNPV    | ---        | KVRNKR    | ---        | ---         | ---      | ---       | ---      | ---      | ---    | ---     | ---       | ---         | ---      |   |
| ACF05406.1 AadorNPV   | ---        | KRNRKR    | ---        | ---         | ---      | ---       | ---      | ---      | ---    | ---     | ---       | ---         | ---      |   |
| ACQ70316.1 LdMNPV     | ---        | LAPRRKR   | ---        | ---         | ---      | ---       | ---      | ---      | ---    | ---     | ---       | ---         | ---      |   |
| ADD73835.1 LxyxMNPV   | ---        | LATRKR    | ---        | ---         | ---      | ---       | ---      | ---      | ---    | ---     | ---       | ---         | ---      |   |
| AA95955.1 CibiNPV     | ---        | GGDV      | HRRAKR     | ---         | ---      | ---       | ---      | ---      | ---    | ---     | ---       | ---         | ---      |   |
| AKN80684.1 PelusMNPV  | GGGVA      | I         | GGDK       | QRRKR       | ---      | ---       | ---      | ---      | ---    | ---     | ---       | ---         | ---      |   |
| ABY65853.1 OrlenNPV   | QDVAQR     | A         | TRRKR      | ---         | ---      | ---       | ---      | ---      | ---    | ---     | ---       | ---         | ---      |   |
| AC053584.1 EupsNPV    | L          | TG        | KAVR       | LVK         | QROKR    | ---       | ---      | ---      | ---    | ---     | ---       | ---         | ---      |   |
| AU41354.1 SuijNPV     | TNDR       | I         | VRHKR      | ---         | ---      | ---       | ---      | ---      | ---    | ---     | ---       | ---         | ---      |   |
| orf.32 HytaNPV        | TNKNL      | K         | NRKR       | ---         | ---      | ---       | ---      | ---      | ---    | ---     | ---       | ---         | ---      |   |
| AHH82709.1 BusiNPV    | TNKNL      | K         | NRKR       | ---         | ---      | ---       | ---      | ---      | ---    | ---     | ---       | ---         | ---      |   |
| ABI35801.1 EcoBpNPV   | D          | H         | ES         | V           | M        | S         | K        | R        | R      | R       | R         | R           | R        |   |
| AD844371.1 ApoNPV     | S          | SP        | K          | I           | L        | N         | R        | R        | K      | R       | ---       | ---         | ---      |   |
| AGR56881.1 HespNPV    | S          | R         | E          | S           | A        | E         | R        | G        | H      | L       | R         | R           | R        |   |
| AAK96377.1 HearNPV    | V          | T         | D          | K           | P        | T         | F        | S        | ---    | ---     | ---       | ---         | ---      |   |
| AKR17392.1 UrrpNPV    | S          | T         | K          | A           | P        | S         | F        | N        | A      | K       | R         | R           | R        |   |
| AF164959.1 ImabNPV    | P          | T         | ---        | ---         | ---      | ---       | ---      | ---      | ---    | ---     | ---       | ---         | ---      |   |
| AAM091117.1 MacoNPV/A | P          | P         | ---        | ---         | ---      | ---       | ---      | ---      | ---    | ---     | ---       | ---         | ---      |   |
| AY84081.1 ChroMNPV    | S          | R         | K          | R           | ---      | ---       | ---      | ---      | ---    | ---     | ---       | ---         | ---      |   |
| AJD08030.1 ChinSNPV   | ---        | N         | R          | S           | K        | R         | ---      | ---      | ---    | ---     | ---       | ---         | ---      |   |
| AZ67513.1 TnNPV       | ---        | S         | R          | S           | K        | R         | ---      | ---      | ---    | ---     | ---       | ---         | ---      |   |
| AE47740.1 PespNPV     | ---        | L         | K          | T           | H        | R         | R        | K        | ---    | ---     | ---       | ---         | ---      |   |
| AZ382174.1 AgseNPV-A  | DE         | ---       | P          | Y           | P        | S         | R        | R        | R      | ---     | ---       | ---         | ---      |   |
| AC128714.1 AgipMNPV   | E          | ---       | D          | D           | S        | K         | R        | K        | ---    | ---     | ---       | ---         | ---      |   |
| AIZ48567.1 AgseNPV-B  | E          | ---       | N          | D           | D        | S         | K        | R        | K      | ---     | ---       | ---         | ---      |   |
| AAF33539.1 SemNPV     | S          | ---       | P          | T           | K        | R         | ---      | ---      | ---    | ---     | ---       | ---         | ---      |   |
| ABM45723.1 SImNPV-19  | E          | ---       | K          | T           | N        | T         | ---      | ---      | ---    | ---     | ---       | ---         | ---      |   |
| AAR28930.1 LeseNPV    | ---        | D         | A          | P           | P        | R         | R        | R        | ---    | ---     | ---       | ---         | ---      |   |
| AA01818.1 SpilNPV     | V          | E         | R          | L           | D        | E         | R        | L        | R      | S       | R         | R           | R        |   |

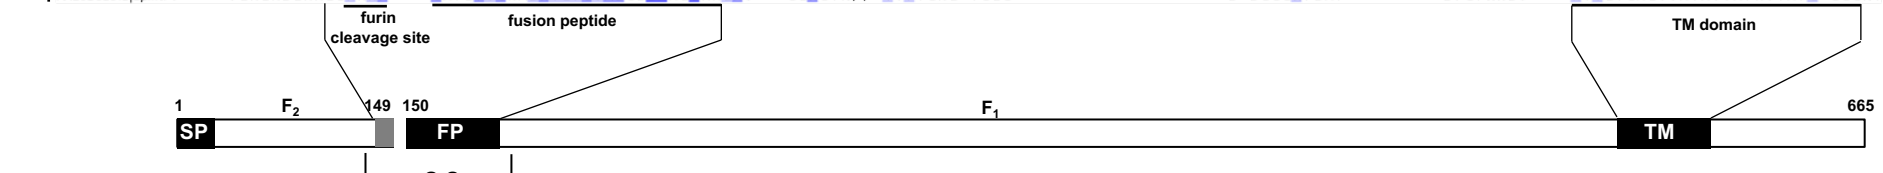



# Supplementary Figure S6

Reference sequence (1): AcMNPV  
 Identities normalised by aligned length.  
 Colored by: identity + property

|                |        |     |                           |                   |                        |                       |                     |                   |
|----------------|--------|-----|---------------------------|-------------------|------------------------|-----------------------|---------------------|-------------------|
|                |        | 1 [ | .                         | .                 | .                      | :                     | .                   | .                 |
| 1 AcMNPV       | 100.0% | ac  | tattgtctgcgagcagttg       | tttgt--           | tgtttaa                | -aataacagccattg       | taatgagacgc--       | acaaactaatatcac-- |
| 2 BusuNPV      | 48.6%  | -   | ctttaa-atgctgctgttg       | gcacat--          | cgatctgtgttacat---     | gttgaaacg-gatg-agat-- | ctcaatattttga       |                   |
| 3 HytaNPV      | 50.0%  | -   | attgta-acgcgtactgtcgt-    | cg--              | cacactgacgtttaa        | ---attaacattacatg-    | atattatgcattatcataa |                   |
| 4 SujuNPV      | 48.3%  | --- | tta-atgtaaat--            | ttg               | tacgtgagaaaataataaaaac | ctttgatactactgtat     | gttttttgat          | ttt-tta           |
| consensus/100% |        | ... | sTu.ssGsssss..TsGs.suT..s | sssssu.suTssss... | sTTussAss.sssG...      | ss..sssusTsTs.s...    |                     |                   |
| consensus/90%  |        | ... | sTu.ssGsssss..TsGs.suT..s | sssssu.suTssss... | sTTussAss.sssG...      | ss..sssusTsTs.s...    |                     |                   |
| consensus/80%  |        | ... | sTu.ssGsssss..TsGs.suT..s | sssssu.suTssss... | sTTussAss.sssG...      | ss..sssusTsTs.s...    |                     |                   |
| consensus/70%  |        |     | sTSTTA ATGcuuucSGTTGtsCGT | ssssTusAuTAAAA... | uTTGAsAssAsATG.As      | AssssssAATATssTsA     |                     |                   |

|                |        |                        |                      |                 |                  |                        |                         |                     |
|----------------|--------|------------------------|----------------------|-----------------|------------------|------------------------|-------------------------|---------------------|
|                |        | 81                     | .                    | .               | .                | :                      | .                       | .                   |
| 1 AcMNPV       | 100.0% | aaactggaaatg           | tc-tatcaata-tatag    | ttgct-gat       | atcatggag--      | ataat-taaaatgata       | accatctcgcaa--          |                     |
| 2 BusuNPV      | 48.6%  | acacctg--              | acggctttacagca-tg    | taattgca-tat    | acgatgtttata     | aaattatcaaaat          | ttgttcatt-tacaatc       |                     |
| 3 HytaNPV      | 50.0%  | atactgg--              | acggctt              | atcagtg--       | cgctcgctcta      | acgatg                 | ttttgtaaatt-ttaaa       | ttttgttcatt-tacaac  |
| 4 SujuNPV      | 48.3%  | aaactat--              | atg                  | tat-ccc         | atgacaataatcgat- | tat                    | atgattaattgtaaaat-ttaaa | att-cttcagt-cacaacg |
| consensus/100% |        | AsACsss..AsGss..       | ssCAssu...susTsGss.s | ATAssATssss...  | AsAsT.Ts         | AAAsss.sssCAss.suCAA.. |                         |                     |
| consensus/90%  |        | AsACsss..AsGss..       | ssCAssu...susTsGss.s | ATAssATssss...  | AsAsT.Ts         | AAAsss.sssCAss.suCAA.. |                         |                     |
| consensus/80%  |        | AsACsss..AsGss..       | ssCAssu...susTsGss.s | ATAssATssss...  | AsAsT.Ts         | AAAsss.sssCAss.suCAA.. |                         |                     |
| consensus/70%  |        | AsACTuG AsGscTTssCAUsa | suTAuTsGCT           | TATAsGATGssTtuT | AAAsT Ts         | AAAsTTtuTTCAAT         | sACAAss                 |                     |

|                |        |             |                 |                 |             |                 |         |     |
|----------------|--------|-------------|-----------------|-----------------|-------------|-----------------|---------|-----|
|                |        | 161         | .               | .               | .           | 2               | .       | 217 |
| 1 AcMNPV       | 100.0% | ataaataagta | ttttactg        | ttttcgtaacag    | ttttgt      | aataa-aaaac     | tataaat |     |
| 2 BusuNPV      | 48.6%  | ttcaataagta | tttttttctc      | tattgtaaaaca-tt | gtgaaaaat   | caaatacaacata   |         |     |
| 3 HytaNPV      | 50.0%  | ttcaataagta | tttttttctc      | tattgtaaaaca-tt | gtgaaaaat   | caaatacaacata   |         |     |
| 4 SujuNPV      | 48.3%  | ttcaataagta | ttttttgttc      | tattgtaaaaca-tt | gtgaaaaat   | caaatac-acata   |         |     |
| consensus/100% |        | sTsAA       | AAGTATTTTTsTsTs | GTAAsAss.TTG    | TuAsAA.ss   | AAAsss.ssAss    |         |     |
| consensus/90%  |        | sTsAA       | AAGTATTTTTsTsTs | GTAAsAss.TTG    | TuAsAA.ss   | AAAsss.ssAss    |         |     |
| consensus/80%  |        | sTsAA       | AAGTATTTTTsTsTs | GTAAsAss.TTG    | TuAsAA.ss   | AAAsss.ssAss    |         |     |
| consensus/70%  |        | TTCAAT      | AAGTATTTTTsTsC  | TATTGTA         | AAAAACA TTG | TGAAAAATCAAATAs | AACATA  |     |

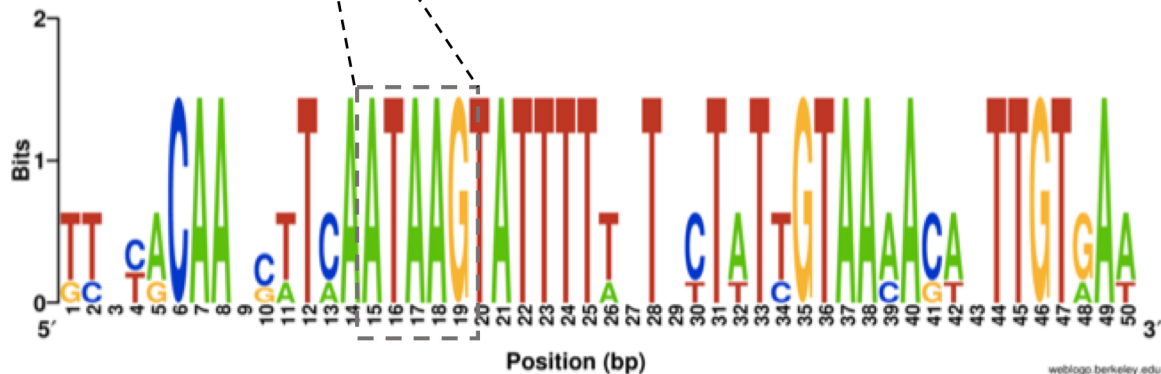

Supplement: 41598_2018_27084_MOESM1_ESM.pdf [file 41598_2018_27084_MOESM1_ESM.pdf]
